# Supplementary material for: Online conversion of reconstructed neural morphologies into standardized SWC format
Source: Research Square preprint supplement (doi:10.21203/rs.3.rs-2693387/v1), 2023-03-16
Supplement: Supplementary file 1 [file e9b36d960b94db266a7c0839.xlsx]

## Sheet: all_original_format
Legend		Count
	Supported (SWC)
	Supported (non-SWC)
	NOT Supported (or Failed during Validation)
	Number of SWC files	88898
	Number of non-SWC files	143131
	Total (NeuroMorpho.Org Version 8.4.0)	232029
Software Name	Format	Count	Conversion/Standardization Success Rate
Aivia	swc	194	1
Amira	am	488	0.7333
Amira	asc	4	1
Amira	swc	1968	1
Arbor	ntr	2	1
Arbor	swc	97	1
Catmaid	hoc	3	0
Catmaid	ser	2	0
Catmaid	swc	3986	1
Custom (Amira)	am	16048	1
Custom	asc	1	1
Custom	hoc	9	1
Custom (HOC)	nrn	4	1
Custom (NTS)	out	62	0.9355
Custom	swc	7789	1
Custom (Nevin NTS)	txt	54	0.963
Custom (NeuroML)	xml	299	1
Eutectic	asc	71	1
Eutectic	geo	5	0
Eutectic	swc	3	1
Eutectic	nts	563	1
Eyewire	swc	395	1
Farsight	swc	2877	1
GTree	swc	274	1
Imaris	asc	10	1
Imaris	dat	8	0.5
Imaris	hoc	3049	0.9986
Imaris	ims	12020	0.9981
Imaris	imx	292	0
Imaris	iv	6	0
Imaris	swc	43604	1
Imaris	zip	3	1
Janelia Workstation-Large Volume Viewer	swc	1007	1
Knossos	nml	3261	1
Knossos	swc	1165	1
Knossos	xml	837	1
LinLab	swc	65	1
NeuroGPS-Tree	swc	227	1
Neurolucida	asc	19672	0.9986
Neurolucida	asc2	1	1
Neurolucida	dat	59268	1
Neurolucida	hoc	30	0.8333
Neurolucida	nrn	26	1
Neurolucida	nrx	2810	1
Neurolucida	swc	1180	1
Neurolucida	traces	157	1
Neurolucida	txt	12	0
Neurolucida	xml	96	1
Neuromantic, NeuronStudio	swc	20	1
Neuromantic	asc	33	1
Neuromantic	swc	2297	1
NeuronJ	ndf	7844	1
NeuronJ	swc	1249	1
NeuronJ	txt	345	1
NeuronStudio	eswc	118	1
NeuronStudio	nst	3	0
NeuronStudio	swc	3829	1
Neuron_Morpho	swc	85	1
Neurozoom	swc	80	1
neuTu, Raveler	swc	1275	1
neuTu	swc	1352	1
neuTube	eswc	39	1
neuTube	swc	3217	1
nTracer	swc	53	1
Orion	swc	10	1
PyKNOSSOS	nmx	1021	1
Raveler	swc	379	1
Reconstruct	swc	17	1
ShuTu	swc	14	1
Simple Neurite Tracer	asc	61	1
Simple Neurite Tracer	hoc	1	0
Simple Neurite Tracer	ndf	24	1
Simple Neurite Tracer	swc	5897	1
Simple Neurite Tracer	traces	13146	1
Simple Neurite Tracer	zip	69	1
SparseTracer	swc	2	1
Tablet	swc	14	1
TRAKA	hoc	2	1
TrakEm2	nml	7	0
TrakEm2	swc	21	1
TREES toolbox	mat	962	1
Trees Toolbox	mtr	260	1
Trees Toolbox	swc	260	1
Vaa3D	eswc	22	1
Vaa3D	swc	3944	1
Viking	swc	52	1
Viking	traces	1	1
	Total no. of files	232029
